# Supplementary material
Source: PubMed Central journal article supplement (PMC5360301)
Supplement: DB161199SupplementaryData.pdf [file DB161199SupplementaryData.pdf]

SUPPLEMENTARY DATA

**Supplementary Figure S1. Genetic deletion of Cnr1 leads to an increase in adipocyte size in inguinal fat.** Related to Figure 1. Representative H&E stain images (n = 6-7 images per mouse) of perirenal (as visceral fat) and inguinal (\*subcutaneous) adipose tissue and quantification of adipocyte diameter in both tissue from Lean (open circles), ZDF (light blue) and ZDF-Cnr1 (dark blue) at 26 week-old. Scale bars, 200  $\mu$ m. Data represent mean  $\pm$  SEM (n = 3 rats per group). Significant difference from corresponding value in lean (\*P < 0.05, \*\*P < 0.01, \*\*\*P < 0.001) or ZDF rats (##P < 0.01, ###P < 0.001).

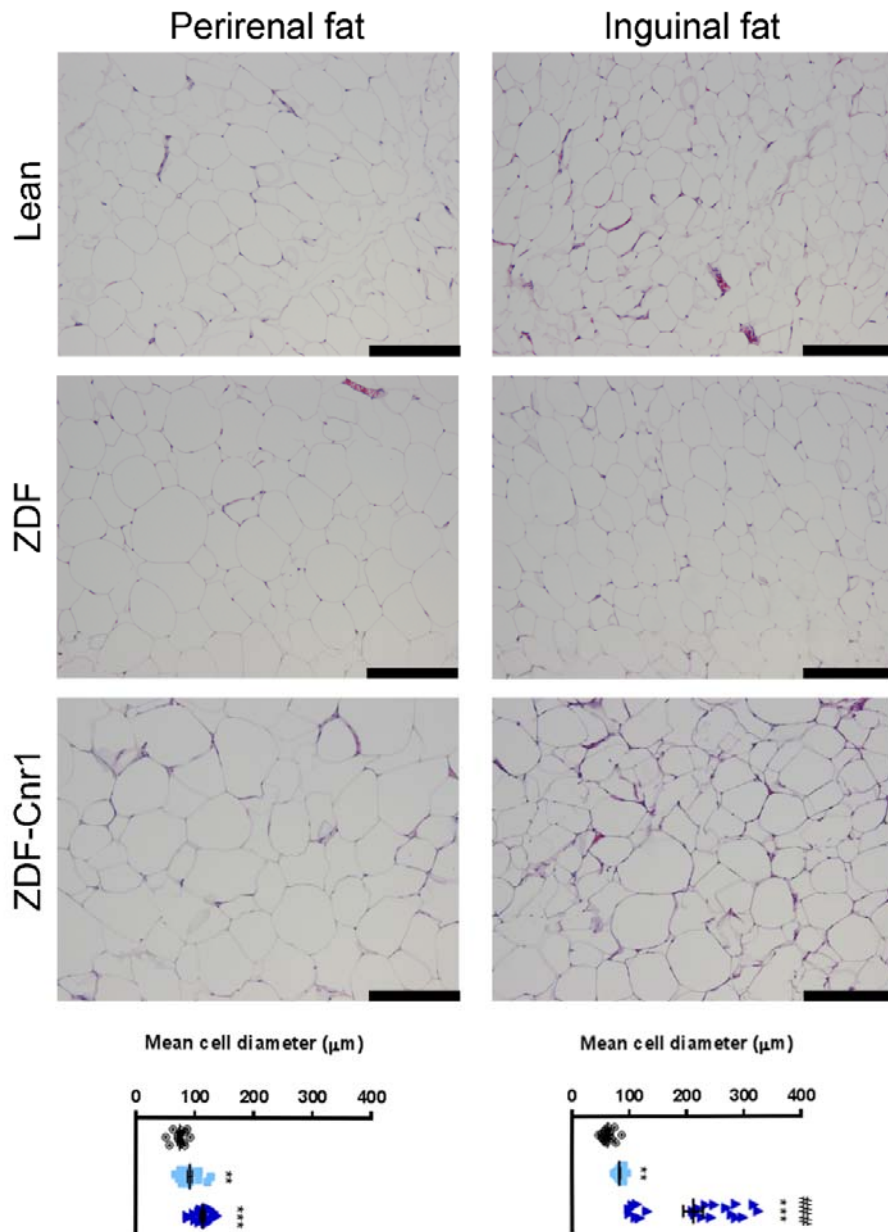

SUPPLEMENTARY DATA

**Supplementary Figure S2. Genetic deletion of Cnr1 protects against  $\beta$ -cell death.** Related to Figure 3. (A) Representative TUNEL stain image of pancreatic islets from ZDF and ZDF-Cnr1 rats. (B) Double immunostaining for insulin and CCL2 in pancreatic islets.

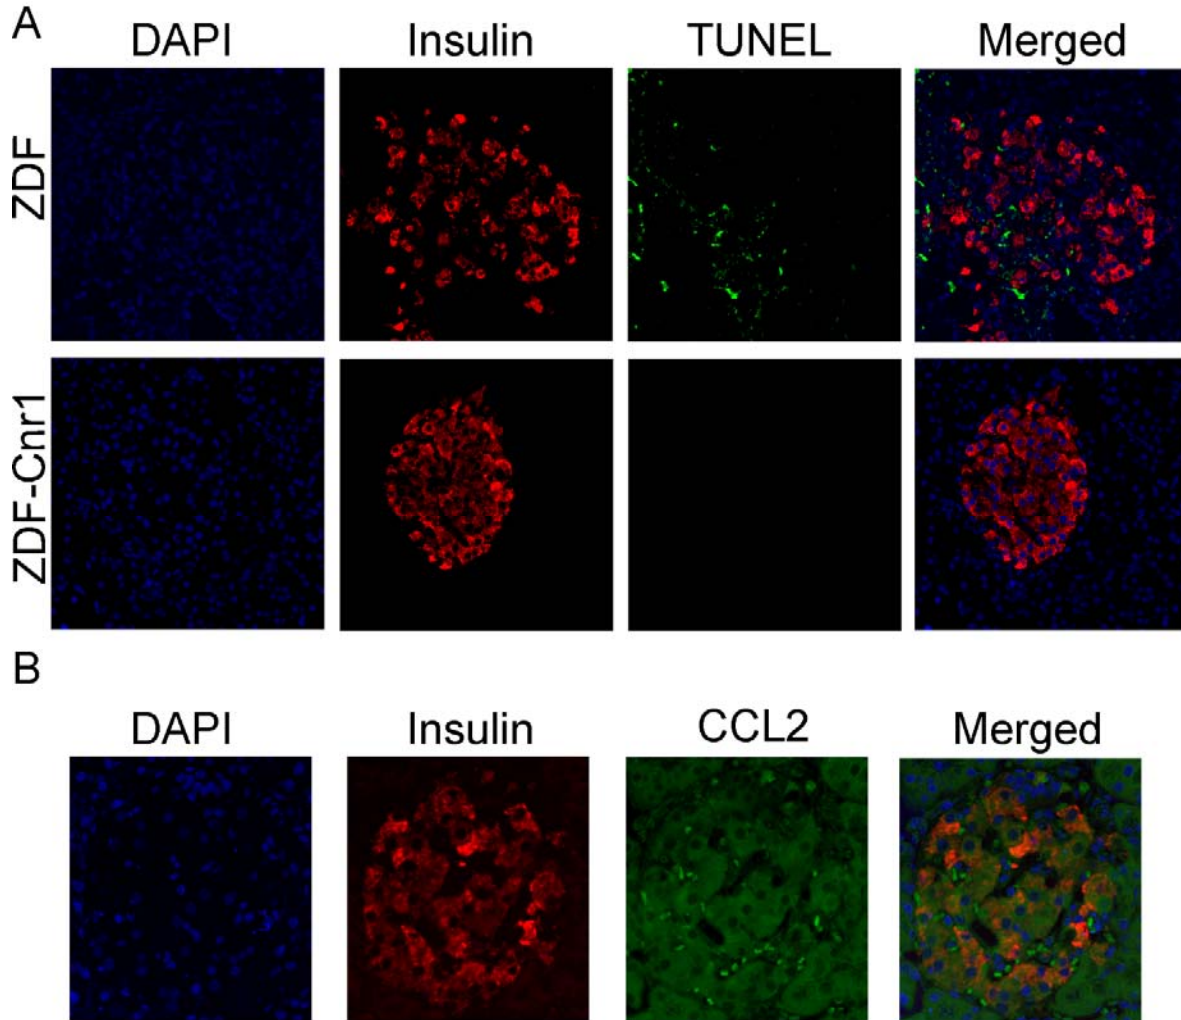

SUPPLEMENTARY DATA

**Supplementary Figure S3. Genetic deletion of Cnr1 protects against the development of diabetic nephropathy.** (A) Serum concentration of creatinine and blood urea nitrogen (BUN); Urinary clearance of creatinine, BUN and albumin; Glomerular filtration rate in lean, ZDF and ZDF-Cnr1 rat. (B) Podocytes identified in glomeruli of lean, ZDF and ZDF-Cnr1 rats by WT-1 immuno-staining. (C) PAS staining and glomerular enlargement quantification. Columns and bars represent mean  $\pm$  SEM (n = 10 rats per group). Significant difference from corresponding value in lean (white bars) (\*P < 0.05, \*\*P < 0.01, \*\*\*P < 0.001) or ZDF rats (light blue bars) (##P < 0.01, ###P < 0.001).

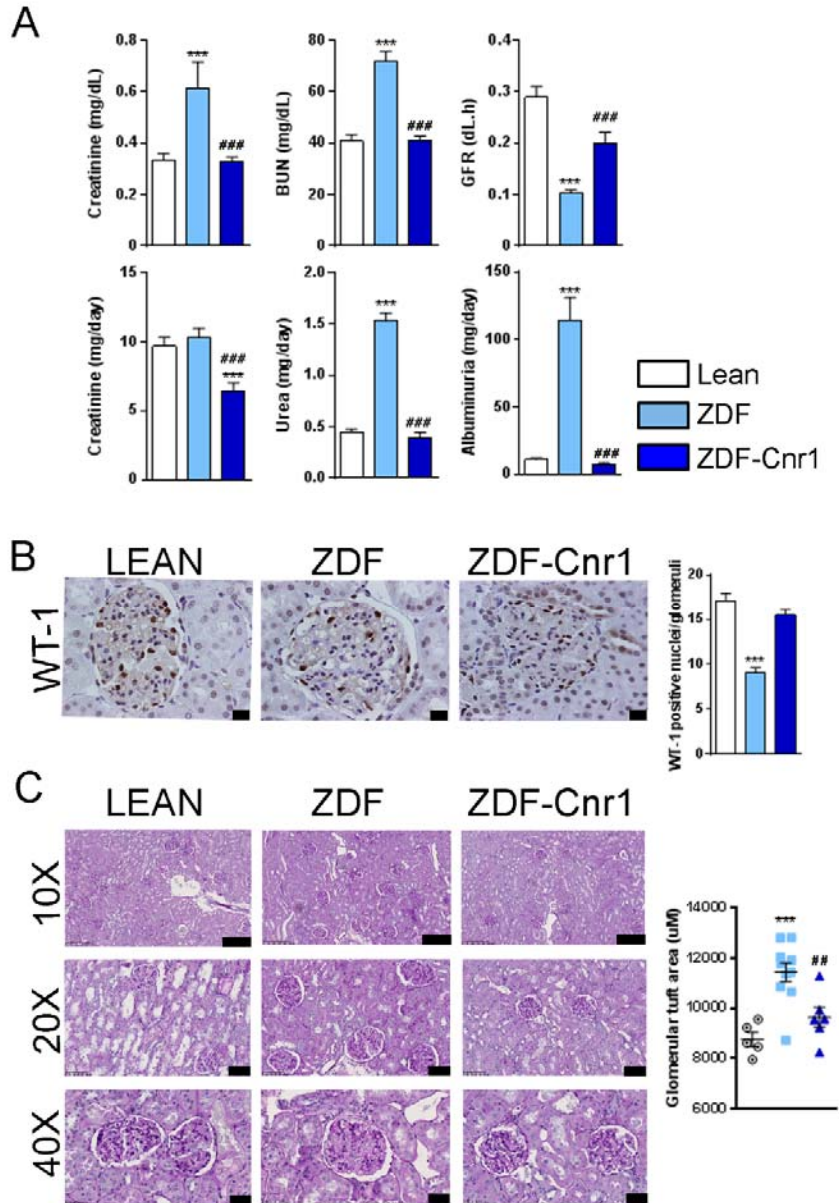

SUPPLEMENTARY DATA

**Supplementary Figure S4. Determination of the optimal radiation dose required to eliminate total white blood cells without being lethal.** Related to Figure 4. Total body radiation exposure from a <sup>137</sup>Cs source was varied between 0.5 to 1.1 Gy and total blood cell count was performed 24h before irradiation and 7 days post-irradiation. WBC: White Blood Cells, NE: Neutrophils, Ly: Lymphocytes, Mo: Monocytes, Eo: Eosinophils and Ba: Basophils. Columns and bars represent mean ± SEM (n = 3 rats per group).

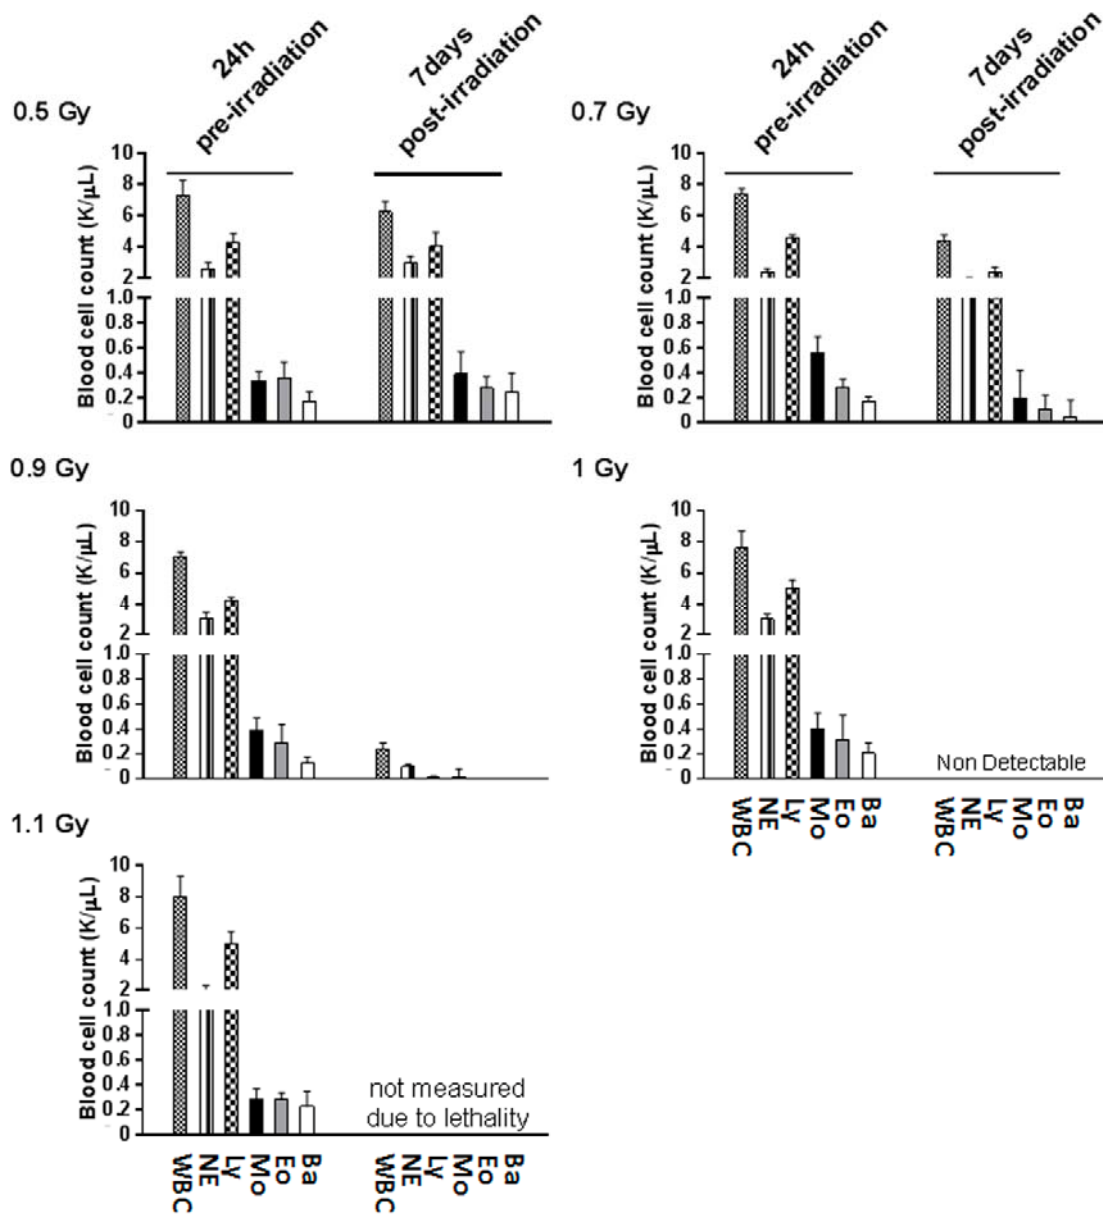

SUPPLEMENTARY DATA

**Supplementary Figure S5. Transplantation with *Cnr1* deficient bone marrow does not prevent the development of diabetic nephropathy.** Related to Figure 4. (A) Serum concentration of creatinine and blood urea nitrogen (BUN); Urinary clearance of creatinine, BUN and albumin; Glomerular filtration rate in ZDF rats receiving wild-type BM (green columns) or *Cnr1*<sup>-/-</sup> BM (purple columns). (B) Podocytes identified in glomeruli of wild-type BM (green columns) and *Cnr1*<sup>-/-</sup> BM (purple columns) by WT-1 immuno-staining. Columns and bars represent mean ± SEM (n = 5 rats per group). Significant difference from corresponding value in ZDF rats receiving wild-type BM (\**P* < 0.05).

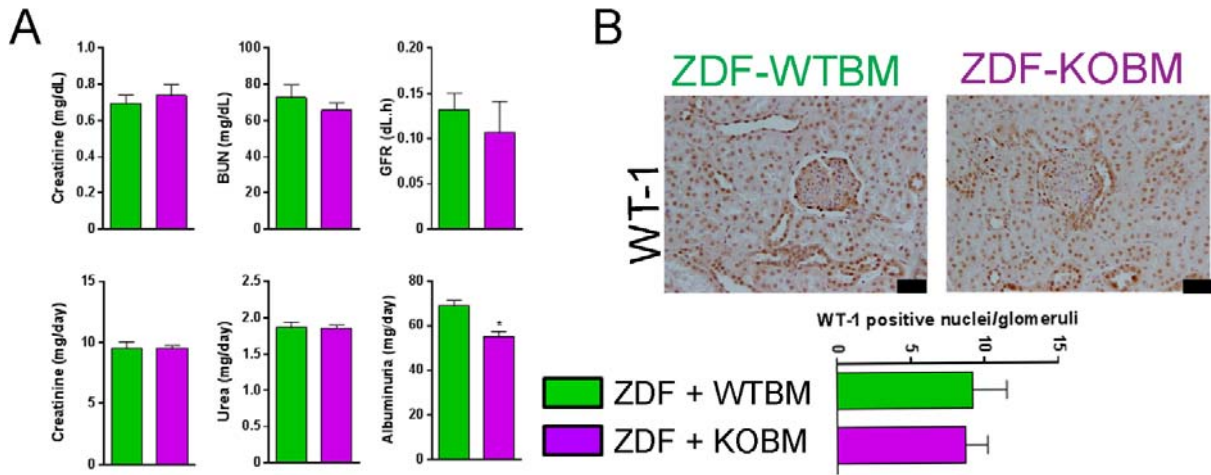



SUPPLEMENTARY DATA

**Supplementary Figure S6. GeRP-Mediated Knockdown of *Irf5* in ZDF Rats macrophages leads to a blunted lymphocyte response in pancreatic islets.** Related to Figure 7. (A) *Cd3* gene expression as marker of T lymphocyte infiltration. (B) Gene expression of *Tbet*, *Ifng* and *Il12* as Th1 response markers. (C) Gene expression of *Gata3* and *Il4* as Th2 response markers. (D) Gene expression of *Rora*, *Rorc* and *Il17* as Th17 response markers. (E) Gene expression for *Il12p40*, *Il23* and *Il10* in pancreatic islets. Columns and bars are means±SEM from 6 rats/group. \* $P < 0.05$ , \*\* $P < 0.01$ , \*\*\* $P < 0.005$  relative to control siRNA-treated group

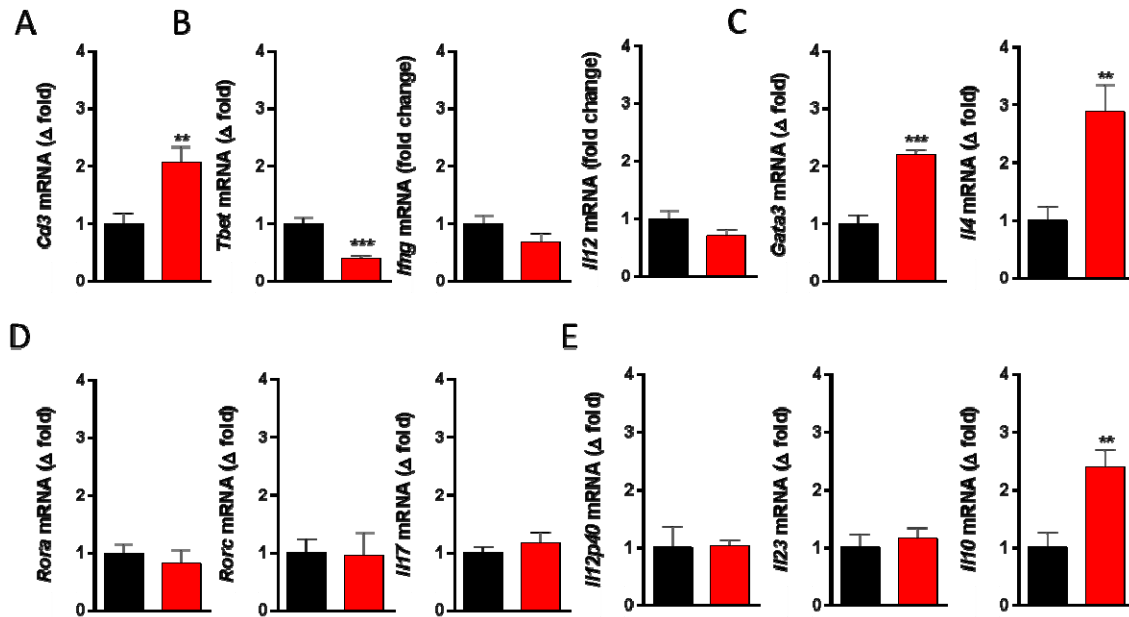

SUPPLEMENTARY DATA

**Supplementary Table S1. Serum parameters in whole body irradiated-BMT rats.**

| <b>Parameters</b>                | <b>ZDF-WT BM cells (n=5)</b> | <b>ZDF-KO BM cells (n=5)</b> |
|----------------------------------|------------------------------|------------------------------|
| <b>Triglycerides (mg/dL)</b>     | 108.1 ±10.1                  | 105.8 ±4.1                   |
| <b>Free fatty acids (µM)</b>     | 176.8 ±6.3                   | 182.1 ±12.5                  |
| <b>Total cholesterol (mg/dL)</b> | 94.7 ±3.3                    | 98.1 ±2.9                    |
| <b>Adiponectin (ng/mL)</b>       | 486.3 ±32.5                  | 472 ± 43.7                   |
| <b>Leptin (pg/mL)</b>            | 3,204.8 ±219.6               | 3,078.7 ±97.9                |

Columns and bars represent mean±SEM. Significant difference from corresponding value in ZDF rats receiving WT BM cells(P>0.05\*, P>0.01\*\*, P<0.001\*\*\*).

SUPPLEMENTARY DATA

**Supplementary Table S2. PCR parameters for *Cnr1* and *Lepr* amplification.**

| <i>Cnr1</i> |           |        |
|-------------|-----------|--------|
| Cycle Step  | Temp (°C) | Time   |
| 1           | 94        | 3 min  |
| 2           | 94        | 30 sec |
| 3           | 56        | 30 sec |
| 4           | 68        | 30 sec |
| 5           | 72        | 5 min  |

**\* 45 cycles**

| <i>Lepr</i> |           |        |
|-------------|-----------|--------|
| Cycle Step  | Temp (°C) | Time   |
| 1           | 95        | 5 min  |
| 2           | 95        | 30 sec |
| 3           | 58        | 30 sec |
| 4           | 68        | 30 sec |
| 5           | 68        | 5 min  |

**\* 35 cycles**

*Cnr1* smF: 5'-gatgcaggccttctaccac, smR: 5'-gctgtctttacgggtggaata.

*Fa* smF: 5'-cgtatggaagtcacagatgatgtatt, *Fa*-smR: 5'-cctctcttacgattgtagaattctct.

After *Fa* PCR, 20 µl of PCR reaction were digested in a total volume of 30 µL with *MspI* (FastDigest *MspI*, Thermo scientific, #FD0544) in order to digest the mutant allele to ~79 bp and 39 bp. *Cnr1* and *Fa* PCR products were resolved on 4% agarose gel and revealed by GreenGlo™ Safe DNA Dye (Denville Scientific inc, CA3600, Metuchen, NJ) using a Gel scanner G:BOX (SYNGENE, Frederick, MD).



SUPPLEMENTARY DATA

**Supplementary Table S3. list of antibodies used for immuno-histology.**

| <b>Proteins</b> | <b>Reference</b> | <b>Supplier</b>                               | <b>Dilution</b> |
|-----------------|------------------|-----------------------------------------------|-----------------|
| CB1R            | L15              | Gift from Dr Ken Mackie (Uni of Indiana, USA) | 1/250           |
| Insulin         | Ab7842           | Abcam, USA                                    | 1/100           |
| CD68            | Ab31630          | Abcam, USA                                    | 1/200           |
| CCL2            | Ab25124          | Abcam, USA                                    | 1/800           |
| WT-1            | 05-753           | Millipore (USA)                               | 1/200           |
| IRF5            | Ab181553         | Abcam, USA                                    | 1/200           |

SUPPLEMENTARY DATA

**Supplementary Table S4. list and sequence of siRNAs used.**

| <b>RAT</b>                                           |                                                |
|------------------------------------------------------|------------------------------------------------|
| <b><i>Cnr1</i></b><br>5'-GCAUCAAGAGCACCGUAAAUU-3'    | <b>Control</b><br>5'-GCAUCAAGUCUACCGUAAAUU-3'  |
| <b><i>Irf5:</i></b><br>5'-GGUUACAGAUGGUGGCUGAUU-3'   | <b>Control:</b><br>5'-GGUUACAGUACGUGGCUGAUU-3' |
| <b>HUMAN</b>                                         |                                                |
| <b><i>CNRI:</i></b><br>5'-CCGCAAAGAUAGCCGCAACUU-3'   | <b>Control:</b><br>5'-CCGCAAAGUAUGCCGCAACUU-3' |
| <b><i>MAPK14:</i></b><br>5'-GGCACACAGAUGAUGAAAUUU-3' | <b>Control:</b><br>5'-GGCACACACUAGAUGAAAUUU-3' |
| <b><i>MAPK11:</i></b><br>5'-GCACGUUCAAUUCCUGGUUUU-3' | <b>Control:</b><br>5'-GCACGUUCUUAUCCUGGUUUU-3' |

SUPPLEMENTARY DATA

**Supplementary Table S5. list of antibodies used for western-blotting.**

| <b>Proteins</b>          | <b>Reference</b> | <b>Supplier</b>                  | <b>Dilution</b> |
|--------------------------|------------------|----------------------------------|-----------------|
| CB1R                     | N/A              | Immunogenes, Hungary             | 1/750           |
| $\alpha$ -p38MAPK        | #4511            | Cell Signalling Technology (USA) | 1/1000          |
| $\alpha$ -p38MAPK        | #9215            | Cell Signalling Technology (USA) | 1/1000          |
| $\alpha$ -pERK1/2        | #4377            | Cell Signalling Technology (USA) | 1/1000          |
| $\alpha$ -pSAPK/JNK      | (#9251           | Cell Signalling Technology (USA) | 1/1000          |
| $\alpha$ -pSAPK/JNK      | #4668            | Cell Signalling Technology (USA) | 1/1000          |
| $\alpha$ -phospho-c-jun  | (#9261           | Cell Signalling Technology (USA) | 1/1000          |
| $\alpha$ -pSTAT3         | #9145            | Cell Signalling Technology (USA) | 1/1000          |
| $\alpha$ -total-ERK1/2   | (#4695           | Cell Signalling Technology (USA) | 1/1000          |
| $\alpha$ -total-SAPK/JNK | (#9252           | Cell Signalling Technology (USA) | 1/1000          |
| $\alpha$ -total-STAT3    | (#4904           | Cell Signalling Technology (USA) | 1/1000          |
| p38MAPK $\alpha$         | Sc-535           | Santa Cruz USA                   | 1/1000          |
| $\beta$ -actin           | Ab49900          | Abcam, USA                       | 1/1000          |
